# Supplementary material for: Risk of precancerous cervical lesions in women using a hormone-containing intrauterine device and other contraceptives: a register-based cohort study from Denmark
Source: PubMed Central journal article supplement (PMC8213448; doi:10.1093/humrep/deab066), 2021-05-11
Supplement: deab066_supplementary_figure_s1.pdf [file deab066_supplementary_figure_s1.pdf]

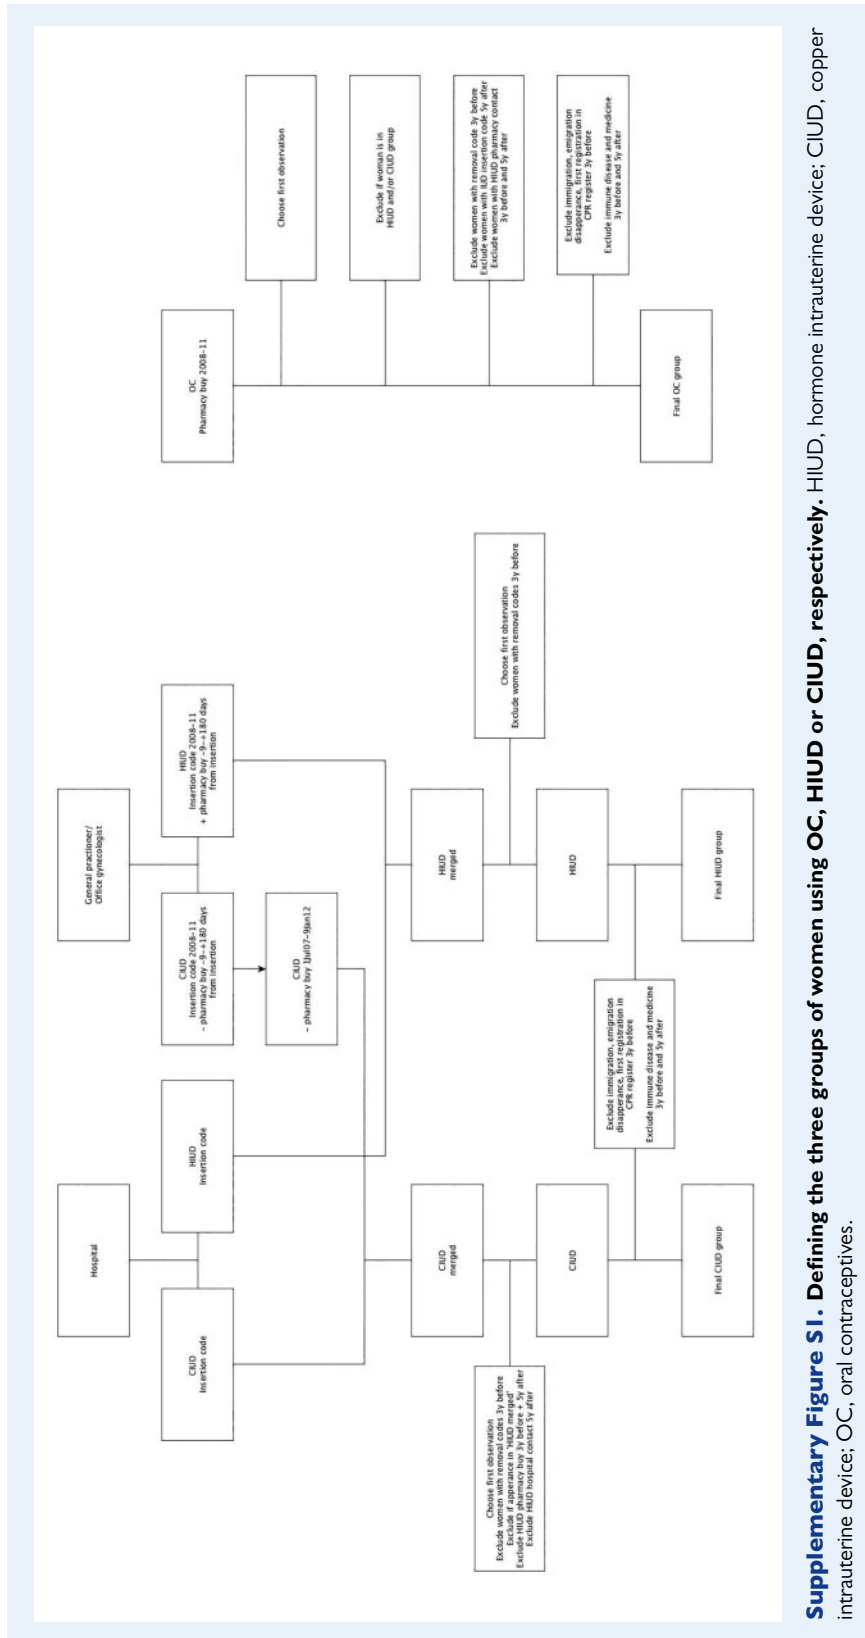

**Supplementary Figure S1. Defining the three groups of women using OC, HIUD or CIUD, respectively.** HIUD, hormone intrauterine device; CIUD, copper intrauterine device; OC, oral contraceptives.
