# Supplementary material for: Risk of precancerous cervical lesions in women using a hormone-containing intrauterine device and other contraceptives: a register-based cohort study from Denmark
Source: PubMed Central journal article supplement (PMC8213448; doi:10.1093/humrep/deab066), 2021-05-11
Supplement: deab066_supplementary_table_s1.pdf [file deab066_supplementary_table_s1.pdf]

human reproduction SUPPLEMENTARY DATA

**Supplementary Table S1** Diagnosis table with definition of progression, persistence and regression.

| After<br>Before  | Cancer | CIN3  | CIN2  | CIN1  | HSIL  | LSIL  | ASCUS | Normal histology | Normal cytology | Total |
|------------------|--------|-------|-------|-------|-------|-------|-------|------------------|-----------------|-------|
| Cancer           | Grey   | Green | Green | Green | Green | Green | Green | Green            | Green           | Grey  |
| CIN3             | Red    | Grey  | Green | Green | Green | Green | Green | Green            | Green           | Grey  |
| CIN2             | Red    | Red   | Grey  | Green | Green | Green | Green | Green            | Green           | Grey  |
| CIN1             | Red    | Red   | Red   | Grey  | Green | Green | Green | Green            | Green           | Grey  |
| HSIL             | Red    | Red   | Red   | Red   | Grey  | Green | Green | Green            | Green           | Grey  |
| LSIL             | Red    | Red   | Red   | Red   | Red   | Grey  | Green | Green            | Green           | Grey  |
| ASCUS            | Red    | Red   | Red   | Red   | Red   | Red   | Grey  | Green            | Green           | Grey  |
| Normal histology | Red    | Red   | Red   | Red   | Red   | Red   | Red   | Grey             | Green           | Grey  |
| Total            | Red    | Red   | Red   | Red   | Red   | Red   | Red   | Red              | Green           | Grey  |

Before, baseline diagnosis; After, follow-up diagnosis; CIN, cervical intraepithelial neoplasia; HSIL, high-grade squamous intraepithelial lesion; LSIL, low-grade squamous intraepithelial lesion; ASCUS, atypical squamous cells of undetermined significance.  
 Red = Progression.  
 Grey = Persistence.  
 Green = Regression.
