# Supplementary material for: Risk of precancerous cervical lesions in women using a hormone-containing intrauterine device and other contraceptives: a register-based cohort study from Denmark
Source: PubMed Central journal article supplement (PMC8213448; doi:10.1093/humrep/deab066), 2021-05-11
Supplement: deab066_supplementary_table_s2.pdf [file deab066_supplementary_table_s2.pdf]

**Supplementary Table SII** The risk of CIN3+ in HIUD, CIUD and OC users, stratified by age groups.

| Age group (years) | Groups    |        |           |        |            |         |            |        |
|-------------------|-----------|--------|-----------|--------|------------|---------|------------|--------|
|                   | HIUD      |        | CIUD      |        | OC         |         | IUDs       |        |
|                   | CIN3+     | Total  | CIN3+     | Total  | CIN3+      | Total   | CIN3+      | Total  |
| 26–30             | 43 (2.1)  | 2095   | 53 (1.9)  | 2834   | 1739 (4.0) | 43 742  | 96 (1.9)   | 4929   |
| 31–35             | 160 (1.9) | 8630   | 125 (1.8) | 7003   | 1019 (2.9) | 35 517  | 285 (1.8)  | 15 633 |
| 36–40             | 185 (1.3) | 13 746 | 103 (1.4) | 7285   | 624 (2.1)  | 29 874  | 288 (1.4)  | 21 031 |
| 41–45             | 161 (1.1) | 14 827 | 63 (1.1)  | 5612   | 305 (1.4)  | 21 996  | 224 (1.1)  | 20 439 |
| 46–50             | 82 (0.7)  | 11 558 | 24 (0.6)  | 3789   | 108 (0.8)  | 13 266  | 106 (0.7)  | 15 347 |
| 51–55             | 14 (0.6)  | 2427   | 5 (0.7)   | 699    | 15 (0.6)   | 2423    | 19 (0.6)   | 3126   |
| All               | 645 (1.2) | 53 283 | 373 (1.4) | 27 222 | 3810 (2.6) | 146 818 | 1018 (1.3) | 80 505 |

  

| Age group (years) | Crude relative risks (RR (95%CI)) |                  |                  |                  |
|-------------------|-----------------------------------|------------------|------------------|------------------|
|                   | HIUD versus OC                    | CIUD versus OC   | HIUD versus CIUD | IUDs versus OC   |
| 26–30             | 0.52 (0.36–0.67)                  | 0.47 (0.34–0.60) | 1.10 (0.66–1.53) | 0.49 (0.39–0.59) |
| 31–35             | 0.65 (0.54–0.75)                  | 0.62 (0.51–0.74) | 1.04 (0.80–1.28) | 0.64 (0.55–0.72) |
| 36–40             | 0.64 (0.54–0.75)                  | 0.68 (0.54–0.82) | 0.95 (0.72–1.18) | 0.66 (0.56–0.75) |
| 41–45             | 0.78 (0.63–0.93)                  | 0.81 (0.59–1.03) | 0.97 (0.69–1.25) | 0.79 (0.65–0.93) |
| 46–50             | 0.87 (0.62–1.12)                  | 0.78 (0.44–1.12) | 1.12 (0.61–1.63) | 0.85 (0.62–1.07) |
| 51–55             | 0.93 (0.26–1.61)                  | 1.16 (0–2.32)    | 0.81 (0–1.63)    | 0.98 (0.32–1.64) |

  

| Age group (years) | Adjusted relative risks** (aRR (95%CI)) |                   |                   |                   |
|-------------------|-----------------------------------------|-------------------|-------------------|-------------------|
|                   | HIUD versus OC                          | CIUD versus OC    | HIUD versus CIUD  | IUDs versus OC    |
| 26–30             | 0.57 (0.40–0.74)                        | 0.51 (0.37–0.65)  | 1.12 (0.67–1.56)  | 0.54 (0.43–0.65)  |
| 31–35             | 0.61 (0.51–0.71)                        | 0.54 (0.44–0.65)  | 1.12 (0.86–1.38)  | 0.58 (0.50–0.66)  |
| 36–40             | 0.61 (0.51–0.72)                        | 0.64 (0.50–0.77)  | 0.96 (0.73–1.19)  | 0.62 (0.53–0.71)  |
| 41–45             | 0.70 (0.56–0.85)                        | 0.72 (0.52–0.93)  | 0.97 (0.69–1.26)  | 0.71 (0.58–0.84)  |
| 46–50             | 0.70 (0.48–0.91)                        | 0.64 (0.35–0.94)  | 1.08 (0.59–1.58)  | 0.68 (0.48–0.88)  |
| 51–55             | 0.74 (0.17–1.30)*                       | 0.96 (0.01–1.90)* | 0.77 (0.07–1.48)* | 0.77 (0.21–1.32)* |

\*aRR computed using Firth logistic regression, due to small values.

\*\*Adjusted for region of residence, education level before age 32 years, time to follow-up, and duration of IUD or OC use.

HIUD: hormone intrauterine device, CIUD: copper intrauterine device, OC: oral contraceptives.
