# Supplementary material for: Risk of precancerous cervical lesions in women using a hormone-containing intrauterine device and other contraceptives: a register-based cohort study from Denmark
Source: PubMed Central journal article supplement (PMC8213448; doi:10.1093/humrep/deab066), 2021-05-11
Supplement: deab066_supplementary_table_s3.pdf [file deab066_supplementary_table_s3.pdf]

**Supplementary Table SIII** Diagnosis at follow-up for women with normal cytology at baseline.

| Length of exposure (years) | Follow-up diagnosis | Groups           |                  |                  | Crude relative risks (RR (95%CI)) |                   |                     |
|----------------------------|---------------------|------------------|------------------|------------------|-----------------------------------|-------------------|---------------------|
|                            |                     | HIUD<br>N = 9837 | CIUD<br>N = 5335 | OC<br>N = 64 746 | HIUD<br>versus OC                 | CIUD<br>versus OC | HIUD<br>versus CIUD |
| 0-1                        | CIN3+               | 94 (1)           | 59 (1.1)         | 1 135 (1.8)      | 0.55 (0.43–0.66)                  | 0.63 (0.47–0.80)  | 0.86 (0.58–1.14)    |
|                            | CIN2                | 61 (0.6)         | 20 (0.4)         | 488 (0.8)        | 0.82 (0.60–1.04)                  | 0.50 (0.28–0.72)  | 1.66 (0.82–2.49)    |
|                            | CIN1                | 72 (0.7)         | 61 (1.1)         | 572 (0.9)        | 0.83 (0.63–1.03)                  | 1.29 (0.95–1.63)  | 0.64 (0.42–0.86)    |
|                            | Normal histology    | 1 356 (13.8)     | 303 (5.7)        | 2840 (4.4)       | 3.14 (2.95–3.33)                  | 1.29 (1.15–1.44)  | 2.43 (2.14–2.72)    |
|                            | ASCUS+              | 232 (2.4)        | 151 (2.8)        | 1 587 (2.5)      | 0.96 (0.83–1.09)                  | 1.15 (0.96–1.34)  | 0.83 (0.66–1.00)    |
|                            | Normal cytology     | 7 752 (78.8)     | 4 707 (88.2)     | 57 642 (89)      | 0.89 (0.88–0.89)                  | 0.99 (0.98–1.00)  | 0.89 (0.88–0.91)    |
|                            | Undefined* hist     | 31 (0.3)         | 7 (0.1)          | 122 (0.2)        | 1.67 (1.01–2.33)                  | 0.70 (0.17–1.23)  | 2.40 (0.43–4.37)    |
|                            | Undefined* cyt      | 239 (2.4)        | 27 (0.5)         | 360 (0.6)        | 4.37 (3.66–5.08)                  | 0.91 (0.56–1.27)  | 4.80 (2.90–6.71)    |
| 1-2                        | CIN3+               | 128 (1.1)        | 70 (1.2)         | 1 002 (2.7)      | 0.42 (0.34–0.49)                  | 0.44 (0.33–0.54)  | 0.96 (0.68–1.23)    |
|                            | CIN2                | 74 (0.6)         | 36 (0.6)         | 436 (1.2)        | 0.55 (0.42–0.69)                  | 0.52 (0.34–0.69)  | 1.08 (0.65–1.50)    |
|                            | CIN1                | 130 (1.1)        | 61 (1.0)         | 485 (1.3)        | 0.88 (0.71–1.04)                  | 0.78 (0.58–0.99)  | 1.12 (0.78–1.45)    |
|                            | Normal histology    | 902 (7.8)        | 233 (3.9)        | 1 401 (3.7)      | 2.10 (1.93–2.27)                  | 1.04 (0.90–1.18)  | 2.03 (1.74–2.31)    |
|                            | ASCUS+              | 201 (1.7)        | 131 (2.2)        | 1 028 (2.7)      | 0.64 (0.54–0.73)                  | 0.80 (0.65–0.94)  | 0.80 (0.63–0.98)    |
|                            | Normal cytology     | 9 866 (85.8)     | 5 472 (90.9)     | 33 011 (87.8)    | 0.98 (0.97–0.98)                  | 1.03 (1.03–1.04)  | 0.94 (0.93–0.95)    |
|                            | Undefined* hist     | 10 (0.1)         | 5 (0.1)          | 89 (0.2)         | 0.37 (0.13–0.61)                  | 0.35 (0.03–0.67)  | 1.05 (0.00–2.17)    |
|                            | Undefined* cyt      | 188 (1.6)        | 13 (0.2)         | 1 19 (0.3)       | 5.16 (3.98–6.34)                  | 0.68 (0.29–1.07)  | 7.57 (3.32–11.82)   |
| 2-3                        | CIN3+               | 143 (1)          | 81 (1.2)         | 677 (2.8)        | 0.37 (0.30–0.43)                  | 0.43 (0.34–0.53)  | 0.85 (0.62–1.08)    |
|                            | CIN2                | 88 (0.6)         | 49 (0.7)         | 299 (1.2)        | 0.51 (0.39–0.64)                  | 0.60 (0.42–0.77)  | 0.86 (0.56–1.16)    |
|                            | CIN1                | 139 (1.0)        | 53 (0.8)         | 312 (1.3)        | 0.78 (0.62–0.93)                  | 0.62 (0.44–0.80)  | 1.26 (0.86–1.66)    |
|                            | Normal histology    | 769 (5.5)        | 269 (4.0)        | 947 (3.9)        | 1.42 (1.29–1.55)                  | 1.03 (0.89–1.17)  | 1.37 (1.19–1.57)    |
|                            | ASCUS+              | 217 (1.6)        | 122 (1.8)        | 761 (3.1)        | 0.50 (0.42–0.57)                  | 0.58 (0.47–0.69)  | 0.85 (0.67–1.04)    |
|                            | Normal cytology     | 12 489 (89.4)    | 6 101 (90.9)     | 21 256 (87.2)    | 1.03 (1.02–1.03)                  | 1.04 (1.03–1.05)  | 0.98 (0.97–0.99)    |
|                            | Undefined* hist     | 11 (0.1)         | 9 (0.1)          | 44 (0.2)         | 0.44 (0.15–0.72)                  | 0.74 (0.21–1.28)  | 0.59 (0.07–1.10)    |
|                            | Undefined* cyt      | 109 (0.8)        | 27 (0.4)         | 85 (0.4)         | 2.24 (1.61–2.87)                  | 1.15 (0.66–1.65)  | 1.94 (1.12–2.76)    |
| 3-4                        | CIN3+               | 147 (1.3)        | 93 (1.5)         | 535 (4.1)        | 0.31 (0.25–0.37)                  | 0.37 (0.29–0.46)  | 0.83 (0.61–1.04)    |
|                            | CIN2                | 101 (0.9)        | 43 (0.7)         | 205 (1.6)        | 0.56 (0.42–0.69)                  | 0.45 (0.30–0.60)  | 1.23 (0.79–1.67)    |
|                            | CIN1                | 160 (1.4)        | 65 (1.1)         | 212 (1.6)        | 0.85 (0.68–1.02)                  | 0.66 (0.48–0.84)  | 1.29 (0.92–1.66)    |
|                            | Normal histology    | 713 (6.1)        | 282 (4.6)        | 692 (5.3)        | 1.16 (1.04–1.28)                  | 0.88 (0.76–1.00)  | 1.32 (1.14–1.50)    |
|                            | ASCUS+              | 245 (2.1)        | 140 (2.3)        | 504 (3.8)        | 0.55 (0.47–0.63)                  | 0.60 (0.49–0.71)  | 0.92 (0.73–1.10)    |
|                            | Normal cytology     | 10 154 (87.1)    | 5 448 (89.3)     | 10 902 (83.0)    | 1.05 (1.04–1.06)                  | 1.08 (1.06–1.09)  | 0.98 (0.96–0.99)    |

(continued)

**Supplementary Table SIII Continued**

|                            |                     | Groups             |                  |                   | Crude relative risks (RR (95%CI))       |                     |                     |
|----------------------------|---------------------|--------------------|------------------|-------------------|-----------------------------------------|---------------------|---------------------|
|                            |                     | HIUD<br>N = 11 657 | CIUD<br>N = 6103 | OC<br>N = 13 137  | HIUD<br>versus OC                       | CIUD<br>versus OC   | HIUD<br>versus CIUD |
|                            | Undefined* hist     | 12 (0.1)           | 10 (0.2)         | 29 (0.2)          | 0.47 (0.15–0.78)                        | 0.74 (0.21–1.28)    | 0.63 (0.10–1.16)    |
|                            | Undefined* cyt      | 125 (1.1)          | 22 (0.4)         | 58 (0.4)          | 2.43 (1.67–3.18)                        | 0.82 (0.42–1.22)    | 2.97 (1.63–4.32)    |
|                            |                     | Groups             |                  |                   | Crude relative risks (RR (95%CI))       |                     |                     |
|                            |                     | HIUD<br>N = 6325   | CIUD<br>N = 3051 | OC<br>N = 6983    | HIUD<br>versus OC                       | CIUD<br>versus OC   | HIUD<br>versus CIUD |
| 4-5                        | CIN3+               | 133 (2.1)          | 70 (2.3)         | 461 (6.6)         | 0.32 (0.26–0.38)                        | 0.35 (0.26–0.43)    | 0.92 (0.65–1.18)    |
|                            | CIN2                | 89 (1.4)           | 49 (1.6)         | 201 (2.9)         | 0.49 (0.37–0.61)                        | 0.56 (0.39–0.73)    | 0.88 (0.57–1.18)    |
|                            | CIN1                | 140 (2.2)          | 56 (1.8)         | 213 (3.1)         | 0.73 (0.57–0.88)                        | 0.60 (0.43–0.78)    | 1.21 (0.84–1.58)    |
|                            | Normal histology    | 668 (10.6)         | 308 (10.1)       | 586 (8.4)         | 1.26 (1.13–1.39)                        | 1.20 (1.04–1.36)    | 1.05 (0.91–1.18)    |
|                            | ASCUS+              | 294 (4.6)          | 129 (4.2)        | 476 (6.8)         | 0.68 (0.59–0.78)                        | 0.62 (0.50–0.74)    | 1.10 (0.88–1.32)    |
|                            | Normal cytology     | 4847 (76.6)        | 2402 (78.7)      | 4982 (71.3)       | 1.07 (1.05–1.10)                        | 1.10 (1.08–1.13)    | 0.97 (0.95–1.00)    |
|                            | Undefined* hist     | 22 (0.4)           | 6 (0.2)          | 17 (0.2)          | 1.43 (0.53–2.33)                        | 0.81 (0.06–1.56)    | 1.77 (0.17–3.36)    |
|                            | Undefined* cyt      | 132 (2.1)          | 32 (1.0)         | 47 (0.7)          | 3.10 (2.07–4.13)                        | 1.56 (0.86–2.25)    | 1.99 (1.23–2.75)    |
|                            |                     |                    |                  |                   | Adjusted relative risks** (aRR (95%CI)) |                     |                     |
| Length of exposure (years) | Follow-up diagnosis |                    |                  | HIUD<br>versus OC | CIUD<br>versus OC                       | HIUD<br>versus CIUD |                     |
| 0-1                        | CIN3+               |                    |                  | 0.99 (0.77–1.20)  | 0.88 (0.65–1.11)                        | 1.13 (0.76–1.50)    |                     |
|                            | CIN2                |                    |                  | 1.28 (0.92–1.64)  | 0.62 (0.34–0.90)                        | 2.07 (1.02–3.11)    |                     |
|                            | CIN1                |                    |                  | 1.12 (0.83–1.40)  | 1.57 (1.15–2.00)                        | 0.71 (0.47–0.95)    |                     |
|                            | Normal histology    |                    |                  | 2.19 (2.04–2.34)  | 1.02 (0.90–1.15)                        | 2.14 (1.87–2.41)    |                     |
|                            | ASCUS+              |                    |                  | 1.15 (0.99–1.32)  | 1.29 (1.08–1.51)                        | 0.89 (0.71–1.07)    |                     |
|                            | Normal cytology     |                    |                  | 0.90 (0.89–0.91)  | 1.00 (0.99–1.01)                        | 0.91 (0.89–0.92)    |                     |
|                            | Undefined* hist     |                    |                  | 1.25 (0.73–1.78)  | 0.58 (0.13–1.02)                        | 2.17 (0.38–3.96)    |                     |
|                            | Undefined* cyt      |                    |                  | 2.94 (2.42–3.46)  | 0.84 (0.51–1.17)                        | 3.49 (2.10–4.89)    |                     |
|                            |                     |                    |                  |                   | Adjusted relative risks** (aRR (95%CI)) |                     |                     |
|                            |                     |                    |                  | HIUD<br>versus OC | CIUD<br>versus OC                       | HIUD<br>versus CIUD |                     |
| 1-2                        | CIN3+               |                    |                  | 0.73 (0.59–0.87)  | 0.60 (0.45–0.75)                        | 1.22 (0.87–1.58)    |                     |
|                            | CIN2                |                    |                  | 0.92 (0.68–1.16)  | 0.69 (0.45–0.92)                        | 1.34 (0.80–1.87)    |                     |
|                            | CIN1                |                    |                  | 1.35 (1.07–1.64)  | 1.04 (0.75–1.32)                        | 1.31 (0.91–1.71)    |                     |
|                            | Normal histology    |                    |                  | 1.99 (1.81–2.16)  | 1.05 (0.91–1.20)                        | 1.89 (1.62–2.15)    |                     |
|                            | ASCUS+              |                    |                  | 0.76 (0.64–0.88)  | 0.91 (0.74–1.07)                        | 0.84 (0.65–1.02)    |                     |
|                            | Normal cytology     |                    |                  | 0.95 (0.94–0.96)  | 1.02 (1.01–1.03)                        | 0.94 (0.92–0.95)    |                     |
|                            | Undefined* hist     |                    |                  | 0.34 (0.11–0.56)  | 0.36 (0.03–0.68)                        | 0.94 (0.00–1.95)    |                     |
|                            | Undefined* cyt      |                    |                  | 4.30 (3.23–5.37)  | 0.74 (0.31–1.16)                        | 5.83 (2.54–9.12)    |                     |
|                            |                     |                    |                  |                   | Adjusted relative risks** (aRR (95%CI)) |                     |                     |
|                            |                     |                    |                  | HIUD<br>versus OC | CIUD<br>versus OC                       | HIUD<br>versus CIUD |                     |
| 2-3                        | CIN3+               |                    |                  | 0.67 (0.54–0.80)  | 0.64 (0.49–0.79)                        | 1.05 (0.76–1.34)    |                     |
|                            | CIN2                |                    |                  | 0.83 (0.62–1.05)  | 0.81 (0.56–1.05)                        | 1.04 (0.67–1.40)    |                     |
|                            | CIN1                |                    |                  | 1.19 (0.92–1.45)  | 0.87 (0.61–1.13)                        | 1.36 (0.93–1.80)    |                     |
|                            | Normal histology    |                    |                  | 1.45 (1.31–1.60)  | 1.17 (1.01–1.33)                        | 1.24 (1.07–1.41)    |                     |
|                            | ASCUS+              |                    |                  | 0.59 (0.49–0.68)  | 0.71 (0.57–0.85)                        | 0.83 (0.65–1.01)    |                     |
|                            | Normal cytology     |                    |                  | 1.00 (0.99–1.01)  | 1.02 (1.01–1.03)                        | 0.98 (0.97–0.99)    |                     |

(continued)

**Supplementary Table SIII Continued**

|     |                  | Adjusted relative risks** (aRR (95%CI)) |                                         |                     |
|-----|------------------|-----------------------------------------|-----------------------------------------|---------------------|
|     |                  | HIUD<br>versus OC                       | CIUD<br>versus OC                       | HIUD<br>versus CIUD |
|     | Undefined* hist  | 0.48 (0.15–0.81)                        | 0.82 (0.22–1.41)                        | 0.59 (0.06–1.11)    |
|     | Undefined* cyt   | 2.42 (1.67–3.18)                        | 1.44 (0.80–2.07)                        | 1.69 (0.97–2.41)    |
|     |                  | Adjusted relative risks** (aRR (95%CI)) |                                         |                     |
|     |                  | HIUD<br>versus OC                       | CIUD<br>versus OC                       | HIUD<br>versus CIUD |
| 3-4 | CIN3+            | 0.47 (0.38–0.57)                        | 0.49 (0.38–0.61)                        | 0.96 (0.71–1.21)    |
|     | CIN2             | 0.75 (0.56–0.95)                        | 0.56 (0.37–0.75)                        | 1.34 (0.86–1.83)    |
|     | CIN1             | 1.12 (0.86–1.37)                        | 0.82 (0.59–1.06)                        | 1.35 (0.96–1.75)    |
|     | Normal histology | 1.00 (0.89–1.11)                        | 0.81 (0.70–0.92)                        | 1.23 (1.06–1.40)    |
|     | ASCUS+           | 0.57 (0.47–0.66)                        | 0.66 (0.54–0.79)                        | 0.86 (0.68–1.04)    |
|     | Normal cytology  | 1.04 (1.03–1.05)                        | 1.07 (1.05–1.08)                        | 0.98 (0.97–0.99)    |
|     | Undefined* hist  | 0.46 (0.13–0.78)                        | 0.76 (0.20–1.32)                        | 0.60 (0.09–1.11)    |
|     | Undefined* cyt   | 1.83 (1.23–2.43)                        | 0.72 (0.36–1.07)                        | 2.55 (1.39–3.71)    |
|     |                  |                                         | Adjusted relative risks** (aRR (95%CI)) |                     |
|     |                  | HIUD<br>versus OC                       | CIUD<br>versus OC                       | HIUD<br>versus CIUD |
| 4-5 | CIN3+            | 0.52 (0.41–0.63)                        | 0.47 (0.35–0.59)                        | 1.10 (0.78–1.42)    |
|     | CIN2             | 0.74 (0.54–0.94)                        | 0.71 (0.49–0.94)                        | 1.04 (0.67–1.40)    |
|     | CIN1             | 1.00 (0.77–1.24)                        | 0.76 (0.53–0.99)                        | 1.32 (0.91–1.73)    |
|     | Normal histology | 1.10 (0.98–1.22)                        | 1.16 (1.01–1.32)                        | 0.94 (0.82–1.07)    |
|     | ASCUS+           | 0.75 (0.63–0.86)                        | 0.73 (0.59–0.87)                        | 1.03 (0.81–1.24)    |
|     | Normal cytology  | 1.05 (1.02–1.07)                        | 1.08 (1.05–1.11)                        | 0.97 (0.94–1.00)    |
|     | Undefined* hist  | 1.11 (0.36–1.86)                        | 0.74 (0.04–1.44)                        | 1.49 (0.13–2.85)    |
|     | Undefined* cyt   | 2.98 (1.92–4.03)                        | 1.53 (0.84–2.22)                        | 1.95 (1.19–2.70)    |

Data are crude and adjusted RR with 95% CI. Stratified by length of exposure.

\*Undefined = Other/unsatisfactory.

\*\*Adjusted for age, region of residence, education level before age 32 years, and time to follow-up.
